# Supplementary material for: Tracking accelerated oxygen evolution reaction enabled by explosive reconstruction of active species based on CoxN@NC
Source: Royal Society of Chemistry journal article supplement (doi:10.1039/d4ta00196f), 2024-01-01
Supplement: d4ta00196f1.pdf [file d4ta00196f1.pdf]

Supplementary Material for

**Tracking Accelerated Oxygen Evolution Reaction Enabled by Explosive Reconstruction of Active Species based on Co<sub>x</sub>N@NC**

Hyung Wook Choi<sup>a,1</sup>, Jiwon Kim<sup>b,1</sup>, Hyeon-Seok Bang<sup>b,e,f</sup>, Khaled Badawy<sup>c</sup>, Ui Young Lee<sup>b</sup>, Dong In Jeong<sup>b</sup>, Yeseul Kim<sup>b</sup>, Kotiba Hamad<sup>b</sup>, Bong Kyun Kang<sup>d</sup>, Byung Mook Weon<sup>b</sup>, Hyung-Suk Oh<sup>e,f,\*</sup>, Nirpendra Singh<sup>g,\*</sup>, Dae Ho Yoon<sup>a,b,\*</sup>

<sup>a</sup> SKKU Advanced Institute of Nano Technology (SAINT), Sungkyunkwan University, Suwon 16419, Republic of Korea

<sup>b</sup> School of Advanced Materials Science and Engineering, Sungkyunkwan University, 2066, Seobu-ro, Jangan-gu, Suwon-si, Gyeonggi-do, 16419, Republic of Korea

<sup>c</sup> Mechanical Engineering Department, Khalifa University of Science and Technology, Abu Dhabi-127788, UAE

<sup>d</sup> Department of Electronic Materials, Devices, and Equipment Engineering, Soonchunhyang University, 22, Soonchunhyang-ro, Asan City, Chungnam, 31538, Republic of Korea

<sup>e</sup> Clean Energy Research Center, Korea Institute of Science and Technology (KIST), Hwarang-ro 14-gil 5, Seongbuk-gu, Seoul 02792, Republic of Korea

<sup>f</sup> KIST-SKKU Carbon-Neutral Research Center, Sungkyunkwan University (SKKU), Suwon 16419, Republic of Korea

<sup>g</sup> Department of Physics, Khalifa University of Science and Technology, Abu Dhabi-127788, UAE

**\* Corresponding Authors**

Email address: [dhyoon@skku.edu](mailto:dhyoon@skku.edu) (D. H. Yoon)

Email address: [hyung-suk.oh@kist.re.kr](mailto:hyung-suk.oh@kist.re.kr) (H. Oh)

Email address: [nirpendra.singh@ku.ac.ae](mailto:nirpendra.singh@ku.ac.ae) (N. Singh)

<sup>1</sup> These authors contributed equally to this work.

**Table S1.** Calculated ZPE and entropy corrections terms for individual reactants and full reaction steps.

| Reactant         | ZPE [eV] | TS [eV] | Reaction | $\Delta$ ZPE-T $\Delta$ S [eV] |
|------------------|----------|---------|----------|--------------------------------|
| O                | 0.06     | 0.01    | 1        | 0.32                           |
| OH               | 0.34     | 0.06    | 2        | -0.30                          |
| OOH              | 0.43     | 0.07    | 3        | 0.41                           |
| H <sub>2</sub> O | 0.56     | 0.67    | 4        | -0.37                          |
| H <sub>2</sub>   | 0.27     | 0.41    | -        | -                              |

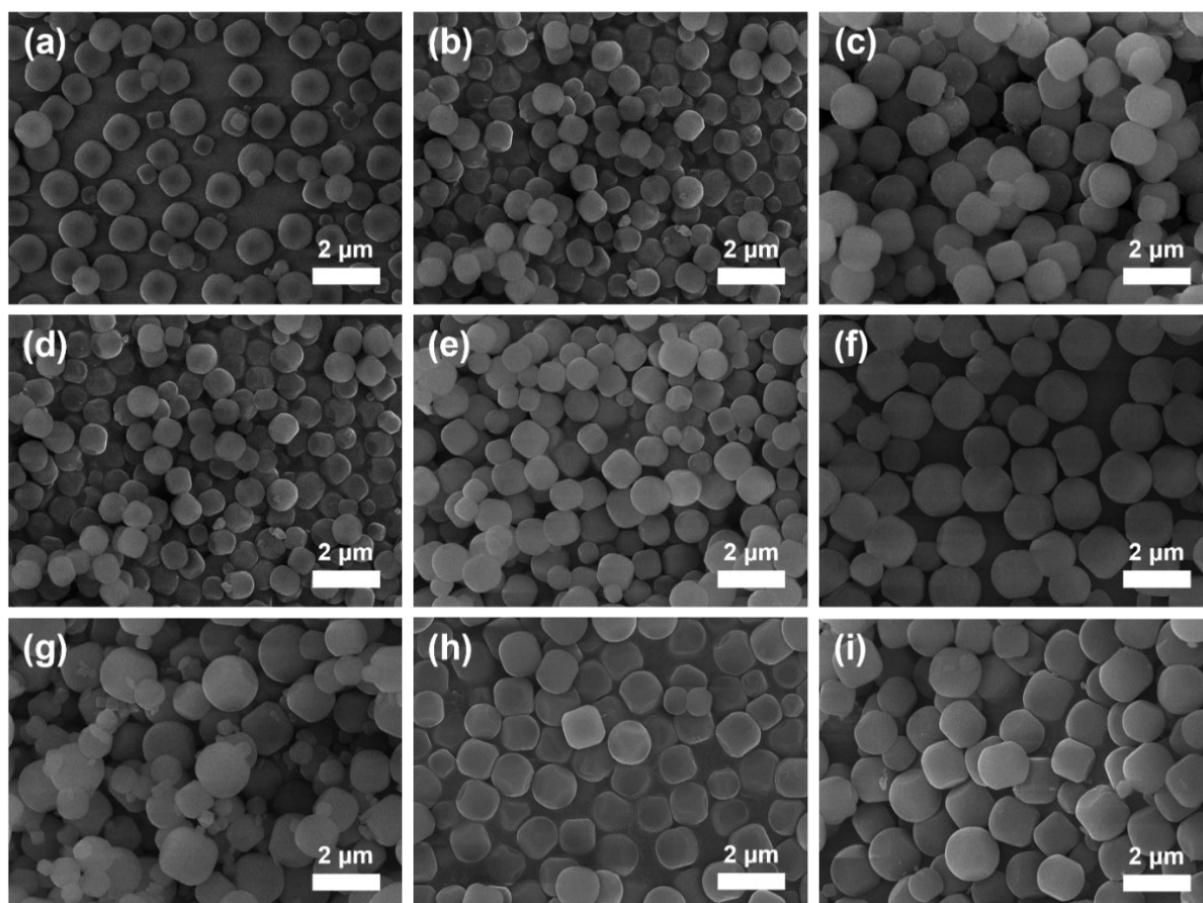

**Fig. S1.** SEM images of the  $\text{Co}_3[\text{Co}(\text{CN})_6]_2$  PBAs synthesized at various condition.  $\text{Co}_3[\text{Co}(\text{CN})_6]_2$  PBAs synthesized with control of the amount of SDBS as (a) 1 g, (b) 1.25 g, (c) 1.5 g, control of pH as (d) 3, (e) 2, (f) 1, and control of temperature as (g) 50 °C, (h) 55 °C, and (i) 60 °C.

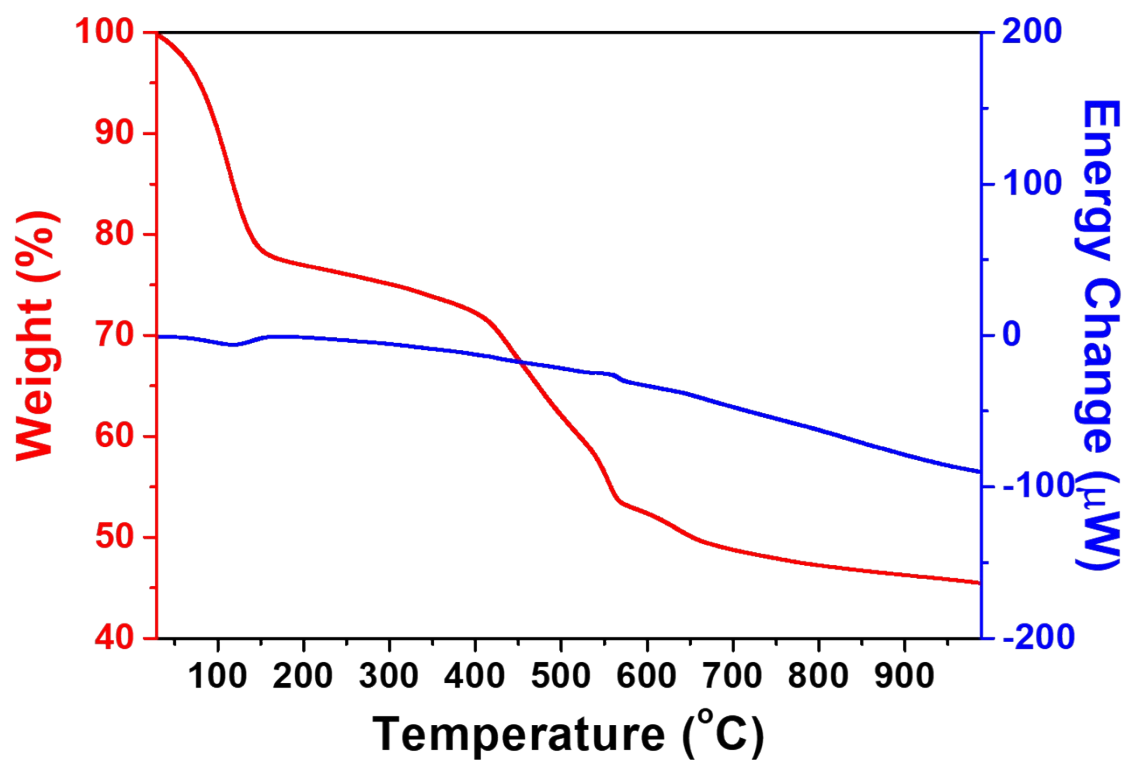

Fig. S2. TG-DTA curves of the  $Co_3[Co(CN)_6]_2$  PBA@PDA coated for 18 h.

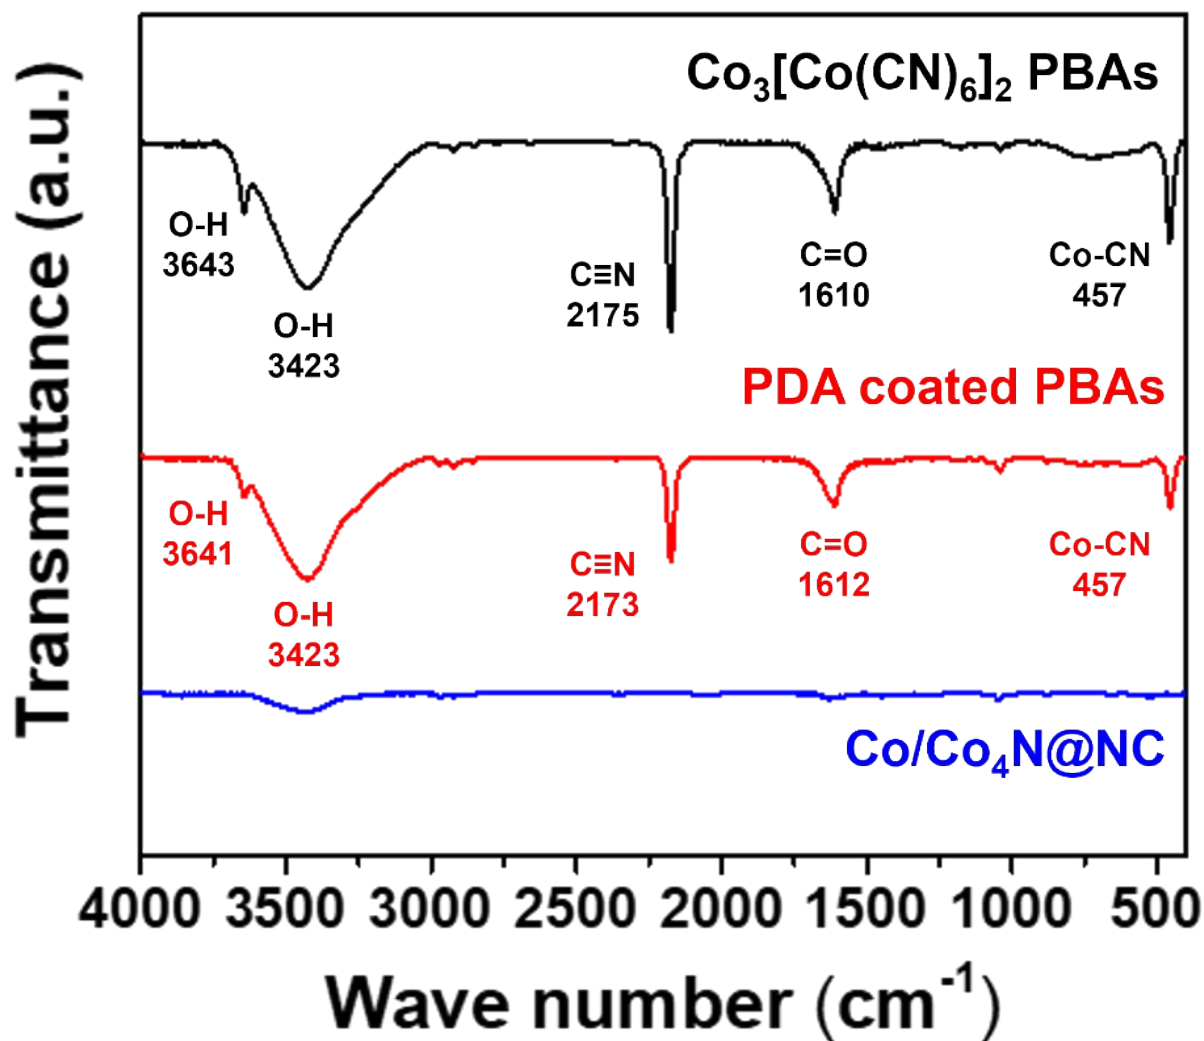

Fig. S3. FT-IR spectra of the  $\text{Co}_3[\text{Co}(\text{CN})_6]_2$  PBA,  $\text{Co}_3[\text{Co}(\text{CN})_6]_2$  PBA@PDA coated for 18 h, and  $\text{Co}/\text{Co}_4\text{N}@/\text{NC}$ .

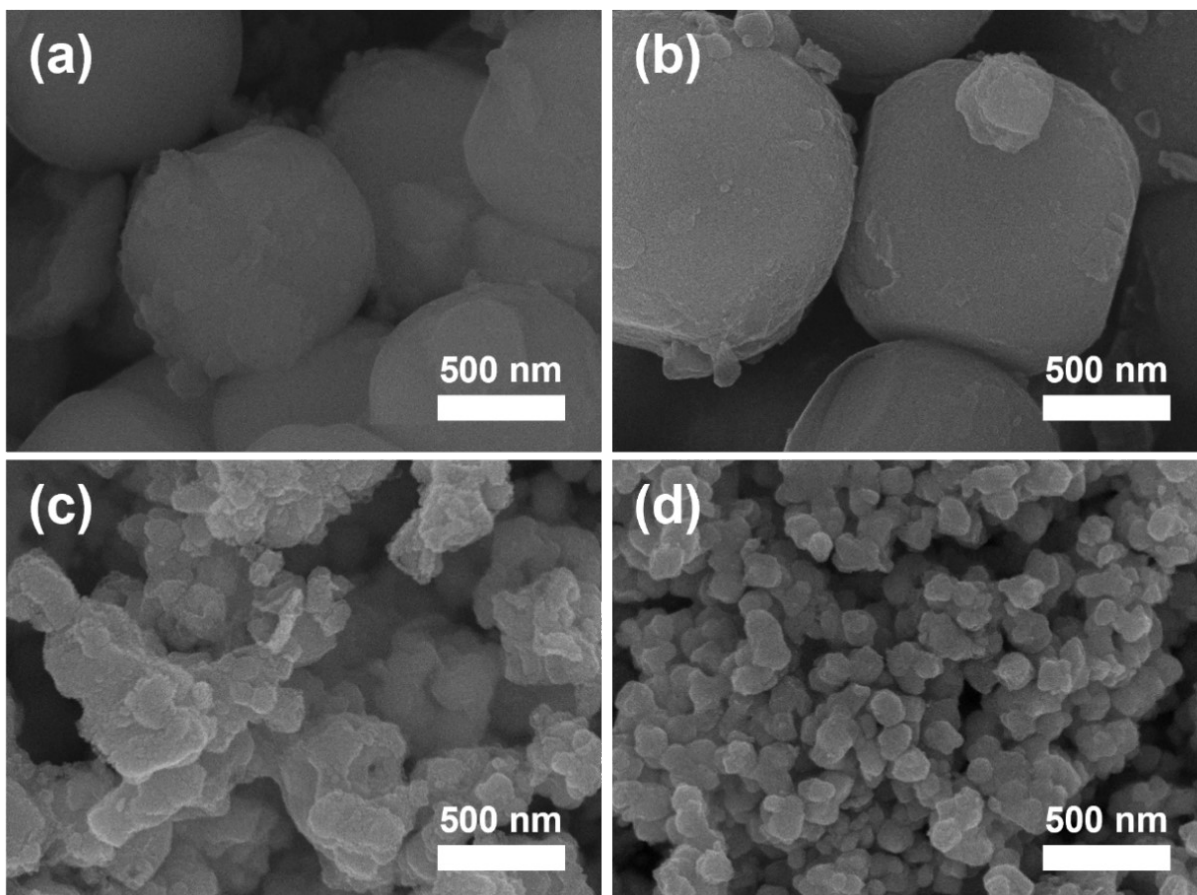

**Fig. S4.** SEM images of the  $\text{Co}_3[\text{Co}(\text{CN})_6]_2$  PBA@PDA with polymerization for (a) 6 h and (b) 12 h. SEM images after the nitridation of (c) the  $\text{Co}_3[\text{Co}(\text{CN})_6]_2$  PBA@PDA coated for 6 h and (d)  $\text{Co}_3[\text{Co}(\text{CN})_6]_2$  PBA@PDA coated for 12 h.

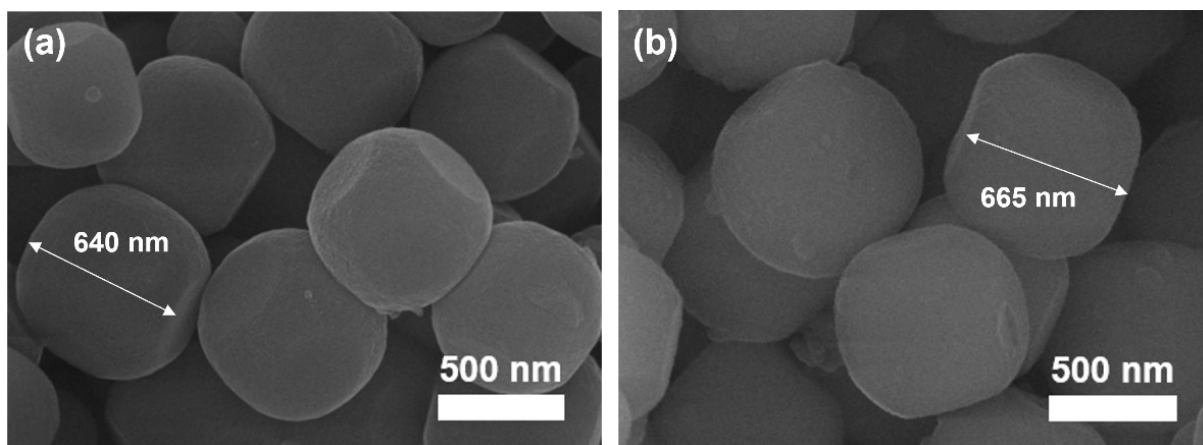

**Fig. S5.** SEM images of (a) the  $\text{Co}_3[\text{Co}(\text{CN})_6]_2$  PBA and (b)  $\text{Co}_3[\text{Co}(\text{CN})_6]_2$  PBA@PDA with polymerization for 18 h.

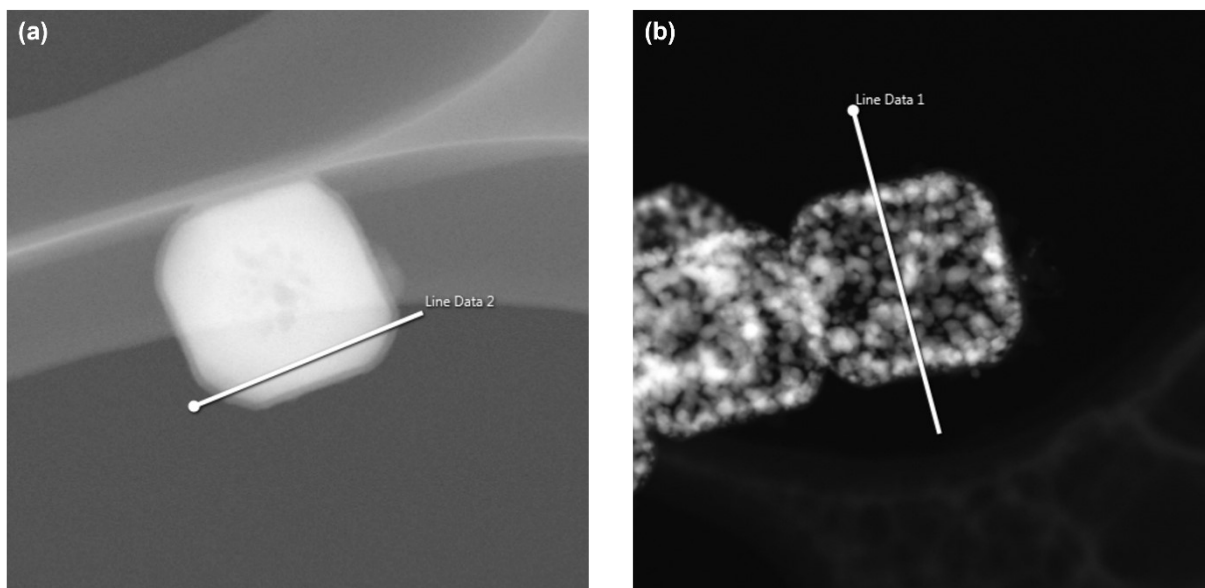

**Fig. S6.** Line EDS profile of (a)  $\text{Co}_3[\text{Co}(\text{CN})_6]_2$  PBAs@PDA and (b) Co/Co<sub>4</sub>N@NC.



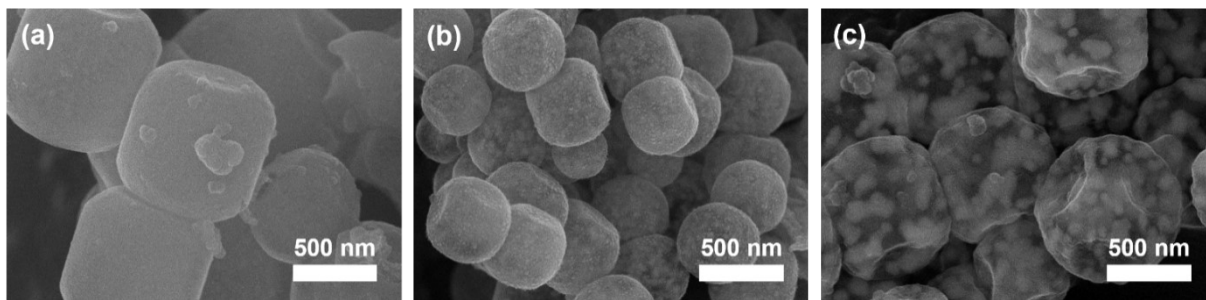

**Fig. S7.** SEM images of (a) the  $\text{Co}_3\text{N@NC}$ , (b)  $\text{Co/Co}_3\text{N@NC}$ , and (c)  $\text{Co/Co}_4\text{N@NC}$ .

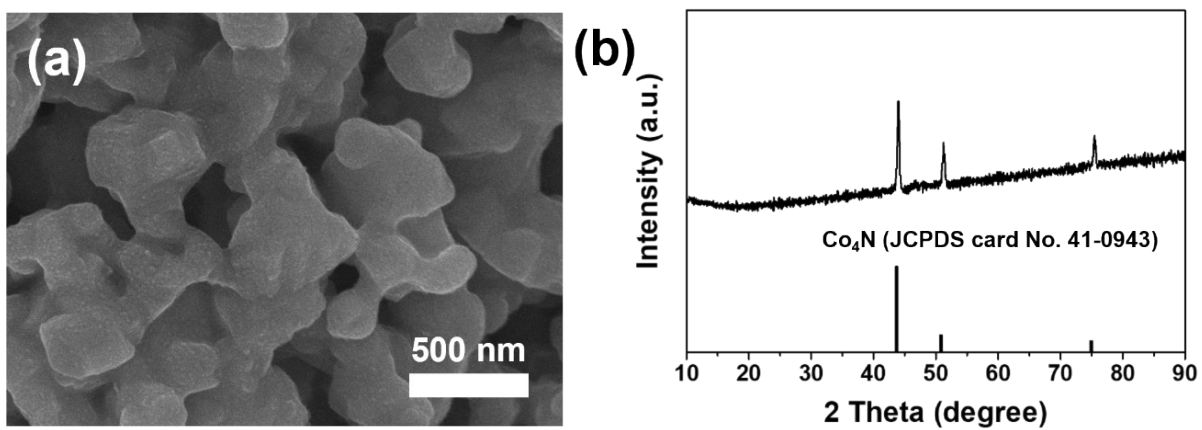

**Fig. S8.** (a) SEM image and (b) XRD pattern of the bulk  $\text{Co}_x\text{N}$ .

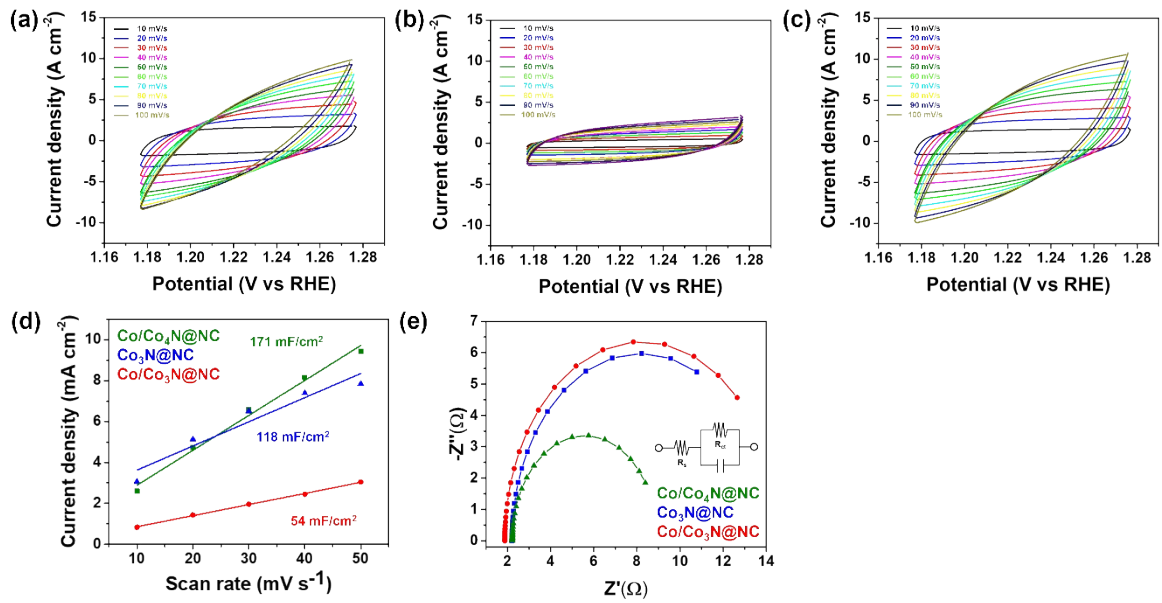

**Fig. S9.** CV curves for (a) the  $\text{Co}_3\text{N@NC}$ , (b)  $\text{Co/Co}_3\text{N@NC}$ , and (c)  $\text{Co/Co}_4\text{N@NC}$  at different scan rates of 10 – 100  $\text{mV s}^{-1}$ . (d) ECSA with Cdl calculated from CV and (e) Nyquist plots of the  $\text{Co}_3\text{N@NC}$ ,  $\text{Co/Co}_3\text{N@NC}$ , and  $\text{Co/Co}_4\text{N@NC}$ .

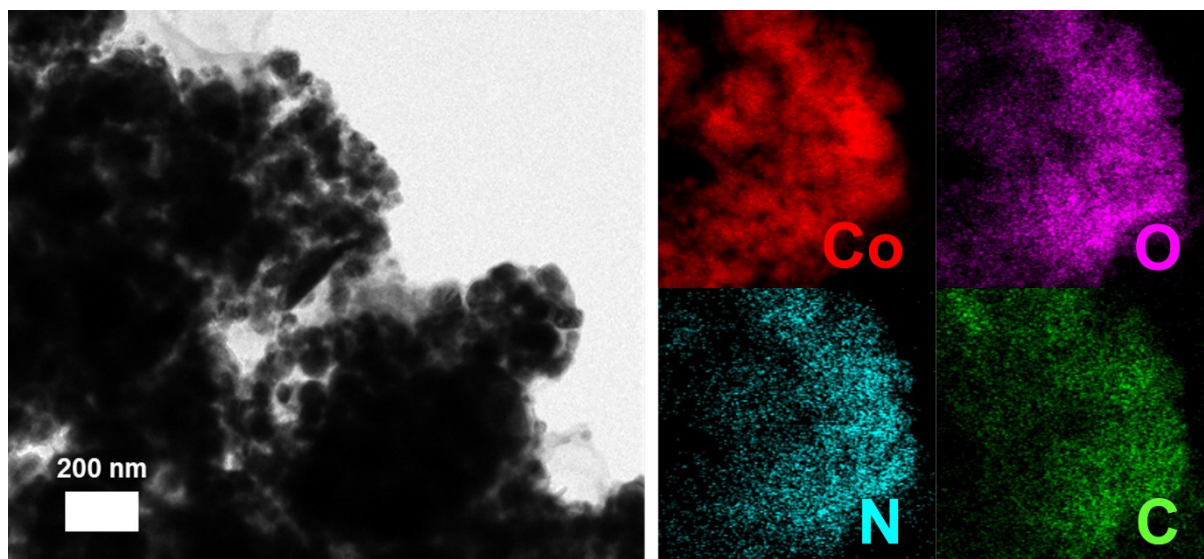

**Fig. S10.** TEM image and EDS mapping results of the Co/Co<sub>4</sub>N@NC after 24 h of stability test.

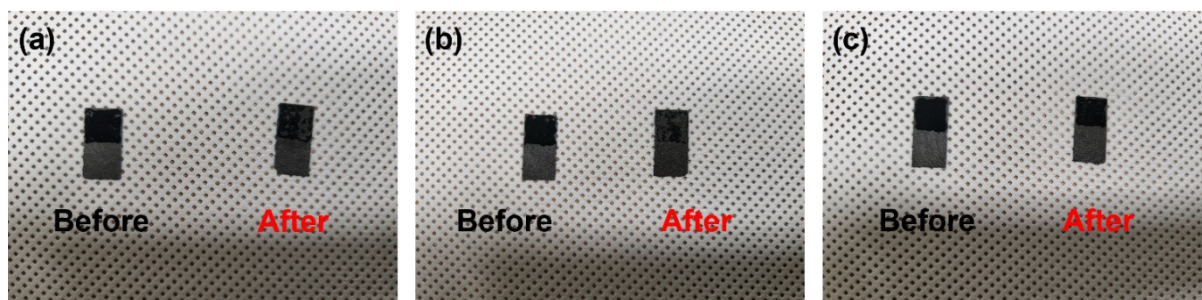

**Fig. S11.** Image of electrocatalysts on carbon paper electrode of (a) Co<sub>3</sub>N@NC electrode, (b) Co/Co<sub>3</sub>N@NC electrode, and (c) Co/Co<sub>4</sub>N@NC electrode.

**Table S2.** Summary of EIS results.

| Catalyst                | $R_s$ ( $\Omega$ ) | $R_{ct}$ ( $\Omega$ ) | Capacitor (F) |
|-------------------------|--------------------|-----------------------|---------------|
| Co <sub>3</sub> N@NC    | 2.202              | 11.96                 | 0.0835        |
| Co/Co <sub>3</sub> N@NC | 1.875              | 12.71                 | 0.05307       |
| Co/Co <sub>4</sub> N@NC | 2.222              | 6.725                 | 0.07094       |

**Table S3.** Summary of results related to OER activity obtained for the various electrocatalysts.

| Catalysts                | Substrate Electrode | Electrolyte                          | Overpotential                                                   | Reference |
|--------------------------|---------------------|--------------------------------------|-----------------------------------------------------------------|-----------|
| Co/Co <sub>4</sub> N@NC  | Carbon paper        | 1.0 M KOH                            | 262 mV@10 mA cm <sup>-2</sup><br>408 mV@100 mA cm <sup>-2</sup> | This work |
| CoNi/NC-YS               | Carbon fiber paper  | 1.0 M KOH                            | 292 mV@10 mA cm <sup>-2</sup>                                   | [1]       |
| Co-N doped CTP           | Glassy carbon       | 0.1 M KOH                            | 334 mV@10 mA cm <sup>-2</sup>                                   | [2]       |
| Co@BNPCFs                | Glassy carbon       | 1.0 M KOH                            | 324 mV@10 mA cm <sup>-2</sup>                                   | [4]       |
| Co-Fe binary<br>oxide    | Carbon fiber paper  | 1.0 M KOH                            | 369 mV@20 mA cm <sup>-2</sup><br>406 mV@100 mA cm <sup>-2</sup> | [5]       |
| Co-NC@Mo <sub>2</sub> C  | Glassy carbon       | 1.0 M KOH                            | 347 mV@10 mA cm <sup>-2</sup>                                   | [10]      |
| NiMo-FG                  | Ni foam             | 1.0 M KOH                            | 338 mV@10 mA cm <sup>-2</sup>                                   | [6]       |
| GNiPy350N                | Glassy carbon       | 0.5 M H <sub>2</sub> SO <sub>4</sub> | 320 mV@10 mA cm <sup>-2</sup>                                   | [7]       |
| Fe-doped NiSe<br>NSs/CNT | Carbon paper        | 1.0 M KOH                            | 282 mV@10 mA cm <sup>-2</sup>                                   | [8]       |
| NiFeP@NPC                | Glassy carbon       | 1.0 M KOH                            | 350 mV@10 mA cm <sup>-2</sup>                                   | [9]       |
| Ru-G/CC                  | Carbon cloth        | 1.0 M KOH                            | 270 mV@10 mA cm <sup>-2</sup>                                   | [3]       |

## References

- [1] G. Hou, X. Jia, H. Kang, X. Qiao, Y. Liu, Y. Li, X. Wu, W. Qin, *Appl. Catal. B: Environ.*, 2022, **315**, 121551.
- [2] J. Zhang, T. Zhang, J. Ma, Z. Wang, J. Liu, X. Gong, *Carbon*, 2021, **172**, 556-568.
- [3] F. Guo, Z. Liu, J. Xiao, X. Zeng, C. Zhang, Y. Lin, P. Dong, T. Liu, Y. Zhang, M. Li, *Chem. Eng. J.*, 2022, **446**, 137111.
- [4] W. Adamson, X. Bo, Y. Li, B. H. R. Suryanto, X. Chen, C. Zhao, *Catal. Today*, 2020, **351**, 44-49.
- [5] Q. Liang, H. Jin, Z. Wang, Y. Xiong, S. Yuan, X. Zeng, D. He, S. Mu, *Nano Energy*, 2019, **57**, 746-752.
- [6] S. Jeong, K. Hu, T. Ohto, Y. Nagata, H. Masuda, J. Fujita, Y. Ito, *ACS Catal.*, 2020, **10**, 792-799.
- [7] A. S. Souza, L. S. Bezerra, E. S. F. Cardoso, G. V. Fortunato, G. Maia, *J. Mater. Chem. A*, 2021, **9**, 11255.
- [8] K. Chang, D. T. Tran, J. Wang, N. H. Kim, J. H. Lee, *J. Mater. Chem. A*, 2022, **10**, 3102.
- [9] J. Wang, F. Giucci, *Appl. Catal. B: Environ.*, 2019, **254**, 292-299.
- [10] M. You, X. Du, X. Hou, Z. Wang, Y. Zhou, H. Ji, L. Zhang, Z. Zhang, S. Yi, D. Chen, *Appl. Catal. B: Environ.*, 2022, **317**, 121729.
